# Supplementary material
Source: Preprints.org preprint supplement (doi:10.20944/preprints201909.0085.v1)
Supplement: Supplementary file 3 [file supplementary]

## Sheet: Table 1
Supplementary Table 1. Sample and analytical data, and 10Be ages for boulders on terminal moraines.
Sample ID	Latitude	Longitude	Elevation (m)	Thickness	Density	Shielding	Erosion Rate	Be Carrier	Mass	10Be/9Be	10Be	10Be Concentration	Be AMS Std.	10Be Age LSDn Scaling	Internal uncertainty	External uncertainty
			(m)	(cm)	(g cm-3)	correction	(cm yr-1)	(mg)	Quartz	(10-13)	(106 atoms)	(105 atoms g-1)		(ka)	(ka)	(ka)
CM-03	39.2106	-106.426	3340	2.5	2.73	0.9986	0	0.3327	33.151	11.28 ± 0.32	24.96 ± 0.70	7.53 ± 0.21	07KNSTD	17.54	0.49	1.15
CM-04	39.218	-106.396	3025	3	2.73	0.9985	0	0.3315	40.005	12.50 ± 0.31	27.84 ± 0.68	6.96 ± 0.17	07KNSTD	19.65	0.48	1.26
Cblk-2558-1								0.3315	--	0.05 ± 0.02	0.11 ± 0.00	--	07KNSTD	--	--	--
CR-CO-MM-01-11	39.2203	-106.387	2938	3	2.73	0.9996	0	0.254422	15.705	6.66 ± 0.14	10.69 ± 0.25	6.81 ± 0.16	07KNSTD	20.25	0.48	1.3
CR-CO-MM-02-11	39.2203	-106.387	2938	3	2.73	0.9996	0	0.257095	19.212	8.08 ± 0.21	13.25 ± 0.37	6.90 ± 0.19	07KNSTD	20.48	0.57	1.34
Cblk-3080-1								0.255919	--	0.37 ± 0.04	0.63 ± 0.06	--	07KNSTD	--	--	--
CR-CO-MM-03-12	39.2732	-106.344	3005	3	2.73	0.9997	0	0.2793	46.822	17.91 ± 0.38	33.42 ± 0.72	7.12 ± 0.15	07KNSTD	20.23	0.44	1.28
CR-CO-LN-01-14	39.275	-106.346	3236.36	3	2.73	0.9999	0	0.2766	25.271	9.70 ± 0.22	17.93 ± 0.41	7.07 ± 0.16	07KNSTD	17.57	0.41	1.12
CR-CO-LN-02-14	39.2749	-106.347	3030.3	3	2.73	0.9999	0	0.2783	41.551	14.75 ± 0.26	27.44 ± 0.49	6.59 ± 0.12	07KNSTD	18.59	0.33	1.15
CR-CO-LN-03-14	39.276	-106.349	3030.3	3	2.73	0.9999	0	0.2791	30.354	9.77 ± 0.33	18.22 ± 0.61	5.98 ± 0.20	07KNSTD	17	0.57	1.16
Cblk-3509-1								0.2808	--	0.04 ± 0.01	0.07 ± 0.02	--	07KNSTD	--	--	--
CR-CO-LN-02-11	39.3209	-106.34	3036.36	3	2.73	0.9995	0	0.2801	19.716	8.15 ± 0.14	15.25 ± 0.27	7.69 ± 0.14	07KNSTD	21.22	0.39	1.32
CR-CO-LN-03-11	39.3231	-106.341	3036.36	3	2.73	0.9995	0	0.2825	20.025	11.19 ± 0.21	21.12 ± 0.40	10.50 ± 0.20	07KNSTD	28.19	0.54	1.76
Cblk-3436-2								0.2876	--	0.05 ± 0.01	0.09 ± 0.03	--	07KNSTD	--	--	--
Cblk-3436-1								0.2828	--	0.04 ± 0.01	0.08 ± 0.02	--	07KNSTD	--	--	--
CR-CO-MM-18-14	39.2151	-106.399	3085.34	3	2.73	1	0	0.2838	37.649	14.04 ± 0.27	26.56 ± 0.51	7.05 ± 0.14	07KNSTD	19.18	0.37	1.2
CR-CO-MM-19-14	39.2147	-106.399	3057.15	3	2.73	1	0	0.2779	55.295	27.67 ± 0.56	51.31 ± 1.03	9.28 ± 0.19	07KNSTD	24.86	0.5	1.56
CR-CO-MM-20-14	39.2169	-106.386	2961.18	3	2.73	1	0	0.2824	41.075	16.54 ± 0.22	31.15 ± 0.41	7.58 ± 0.10	07KNSTD	21.91	0.29	1.33
CR-CO-MM-21-14	39.1861	-106.389	2999.97	3	2.73	1	0	0.2833	56.863	17.88 ± 0.27	33.78 ± 0.52	5.94 ± 0.09	07KNSTD	17.25	0.27	1.06
CR-CO-MM-22-14	39.1863	-106.389	3007.44	3	2.73	1	0	0.2845	48.5	13.87 ± 0.24	26.30 ±0.45	5.42 ± 0.09	07KNSTD	15.75	0.27	0.97
CR-CO-MM-23-14	39.1872	-106.389	3008.01	3	2.73	1	0	0.2834	44.364	13.32 ± 0.24	25.16 ± 0.45	5.67 ± 0.10	07KNSTD	16.43	0.29	1.02
Cblk-3486-1								0.283	--	0.05 ± 0.01	0.31 ± 0.07	--	07KNSTD	--	--	--
Cblk-3486-2								0.2844	--	0.05 ± 0.01	0.33 ± 0.08	--	07KNSTD	--	--	--
Cblk-3486-3								0.2837	--	0.03 ± 0.01	0.20 ± 0.03	--	07KNSTD	--	--	--
